# Supplementary material for: Cation–anion substitution induced spectral tuning and thermal stability optimization in Sr2SiO4:Eu phosphors
Source: Royal Society of Chemistry journal article supplement (doi:10.1039/c6ra28209a), 2017-01-01
Supplement: c6ra28209a1.pdf [file c6ra28209a1.pdf]

## Electronic Supplementary Information

# Cation-Anion Substitution Induced Spectral Tuning and Thermal Stability Optimization in $\text{Sr}_2\text{SiO}_4\text{:Eu}$ Phosphor

Yue Zhu, Jin Wang, Mingyi Zhao, Chonghui Chen, Lingling Zheng, Yingliang Liu, Bingfu Lei,\* Haoran Zhang\*

Guangdong Provincial Engineering Technology Research Center for Optical Agriculture, College of Materials and Energy, South China Agricultural University, Guangzhou 510642, P.R. China

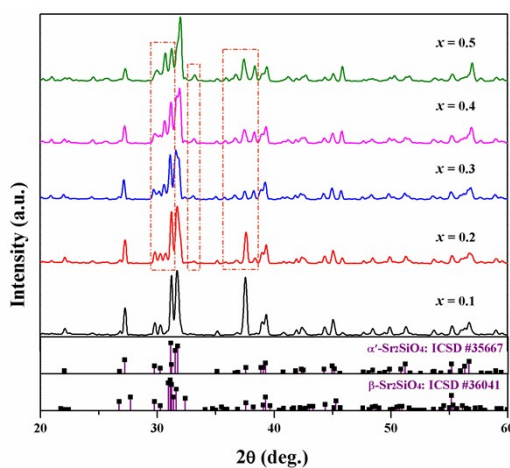

**Figure S1.** XRD patterns of  $\text{Sr}_{1.98}\text{Si}_{1-x}\text{Al}_x\text{O}_{4.2x}\text{N}_x\text{:0.02Eu}$  ( $x = 0.1-0.5$ ), together with the standard data for  $\alpha/\beta\text{-Sr}_2\text{SiO}_4$  (ICSD #35667 and ICSD #36041) as reference.

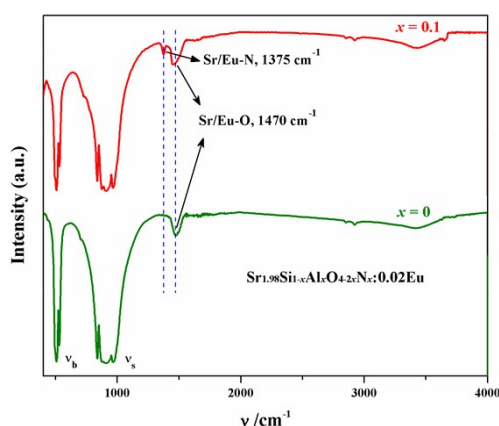

**Fig. S2.** FT-IR spectra of  $\text{Sr}_{1.98}\text{Si}_{1-x}\text{Al}_x\text{O}_{4.2x}\text{N}_x\text{:0.02Eu}$  phosphors.

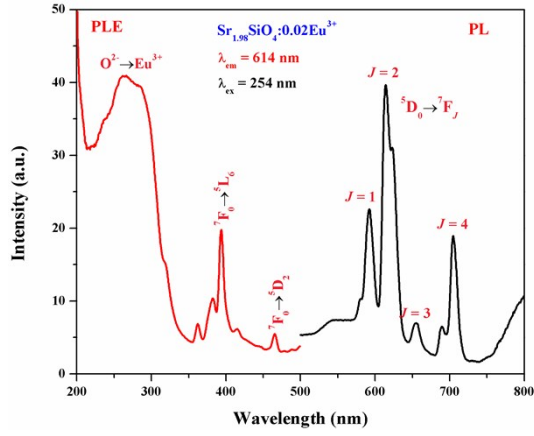

Figure S3. PL ( $\lambda_{\text{ex}} = 254 \text{ nm}$ ) and PLE ( $\lambda_{\text{em}} = 614 \text{ nm}$ ) spectra of  $\text{Sr}_{1.98}\text{SiO}_4:\text{Eu}^{3+}$  phosphor.

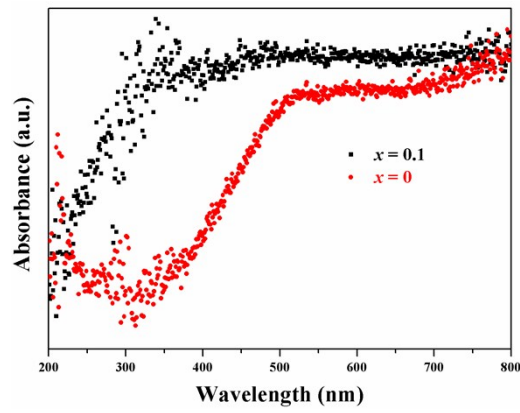

Fig. S4. UV-Vis spectra of  $\text{Sr}_{1.98}\text{Si}_{1-x}\text{Al}_x\text{O}_{4-2x}\text{N}_x:0.02\text{Eu}$  ( $x = 0$  and  $0.1$ ) phosphors.

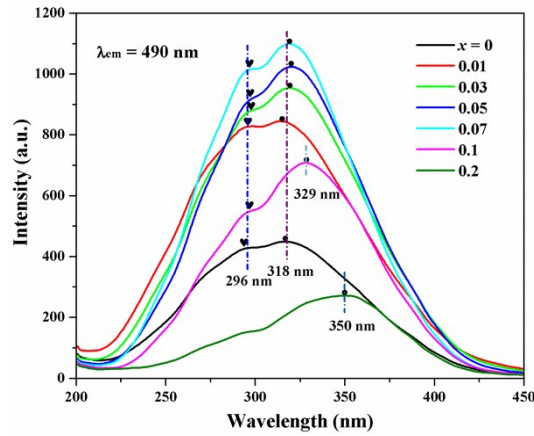

Figure S5. Excitation spectra ( $\lambda_{\text{em}} = 490 \text{ nm}$ ) of  $\text{Sr}_2\text{Si}_{1-x}\text{Al}_x\text{O}_{4-2x}\text{N}_x:0.02\text{Eu}$  ( $x = 0-0.2$ ).
